# Supplementary material
Source: PubMed Central journal article supplement (PMC2903382)

## Supplemental Figure Legends

Figure S1. MCF-7 cells were transfected with hPEBP4-specific siRNA (hPEBP4 siRNA) or mutated hPEBP4 siRNA (mutation control) and cultured in the absence of E2 for 48 h. Then the cells were treated without or with E2 (10nM) for the indicated time and real-time PCR was used to quantify ER $\alpha$  mRNA.

Figure S2. MCF-7 cells were treated with or without Src inhibitor PP1 for 36 h. Cells were then subjected to Western blot analyses as indicated.

Figure S3. A, MCF-7 cells were transfected with hPEBP4-specific siRNA (hPEBP4 siRNA) or mutated hPEBP4 siRNA (mutation control) and cultured in the absence of E2 for 48 h. Then the cells were treated with E2 (10nM) for the indicated time period and subjected to Western blot analysis with the indicated antibodies. B, HeLa cells with stable expression of hPEBP4 (hPEBP4-B) or not (mock) were transfected with pSG5-ER $\alpha$  and cultured in the absence of E2 for 48 h. The cells were then treated with E2 (10nM) for the indicated time period and subjected to Western blot analysis with the indicated antibodies. C, HeLa cells with stable expression of hPEBP4 (hPEBP4-B) or not (mock) were transfected with pSG5-ER $\alpha$  plus MDM2-WT, MDM2-DN or pcDNA3.1 empty vector. 24 h later, cells were transfected with luciferase reporter plasmids of ERE and pGL-TK vectors, cultured for 8 h prior to a 16 h-stimulation with E2 (10nM). The luciferase activity of the cell lysates was measured using dual-luciferase reporter assay system.

Fig S1

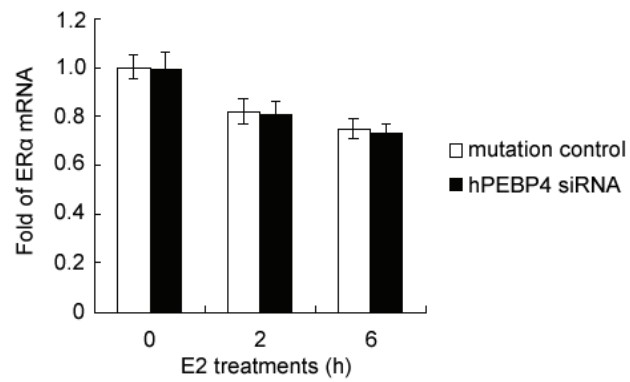

Fig S2

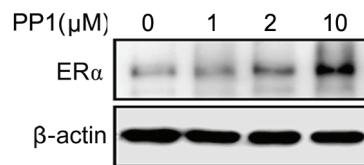

Fig S3

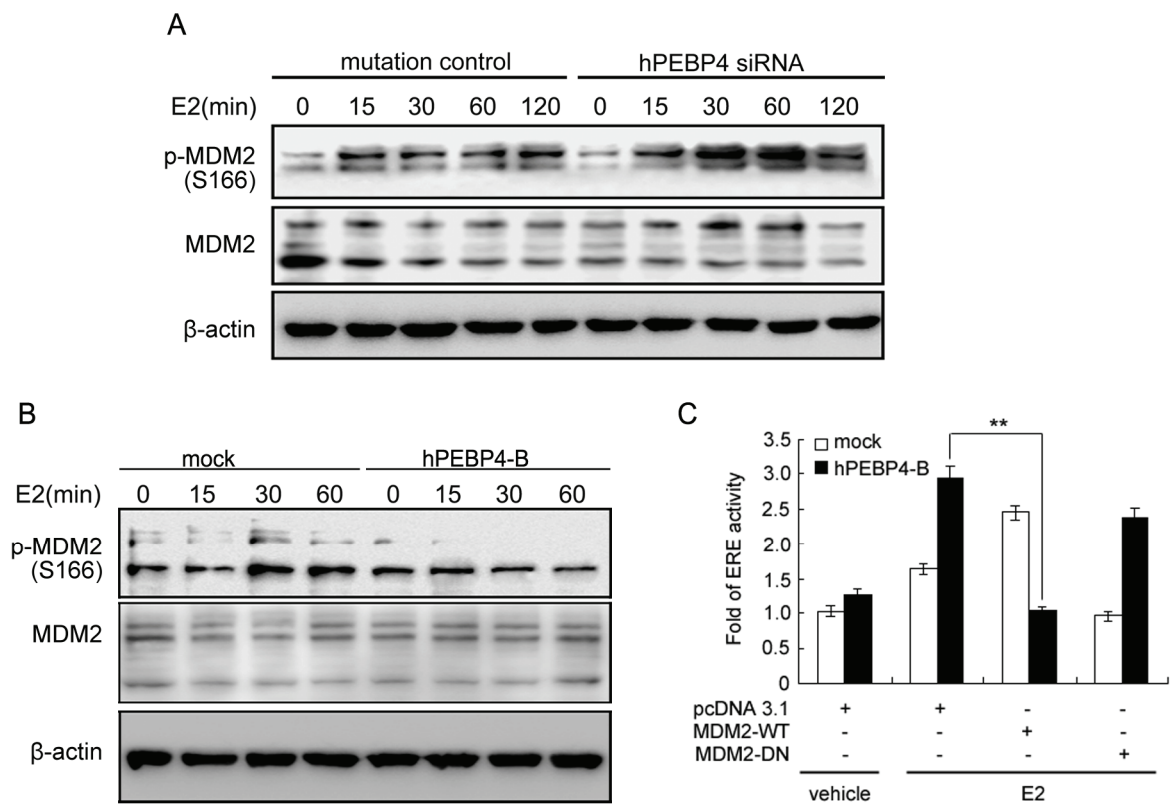

Supplement: supp_M110.109876_jbc.M110.109876-1.pdf [file supp_M110.109876_jbc.M110.109876-1.pdf]
